# Supplementary material
Source: PubMed Central journal article supplement (PMC8783370)
Supplement: NIHMS1769421-supplement-1.pdf [file NIHMS1769421-supplement-1.pdf]

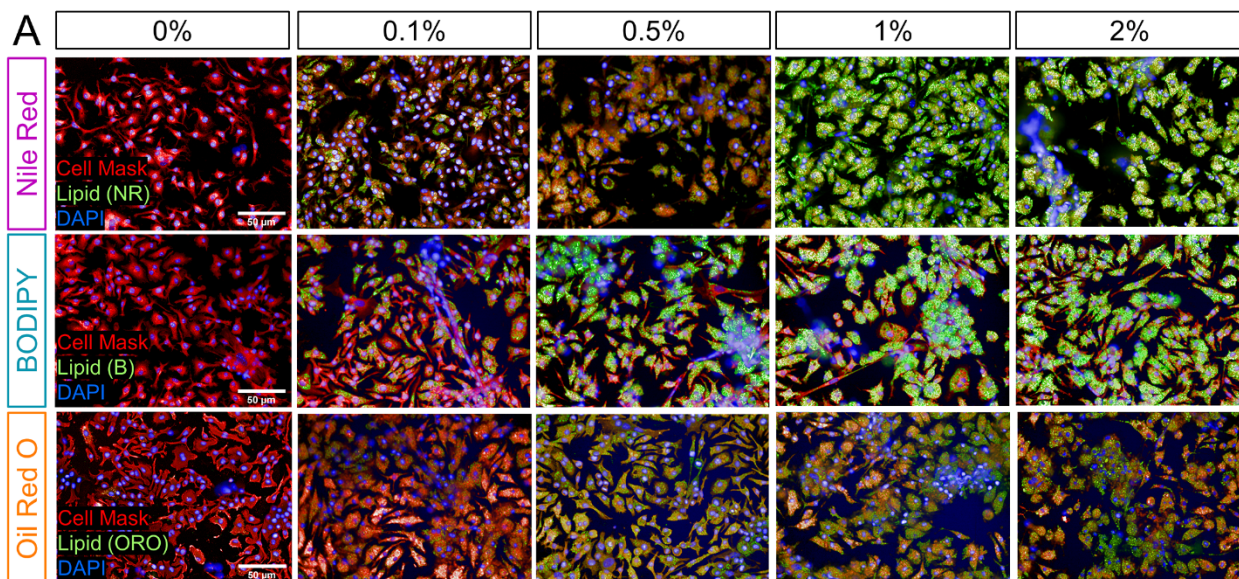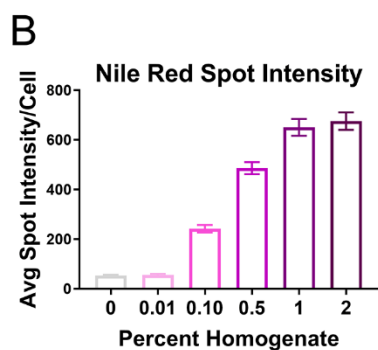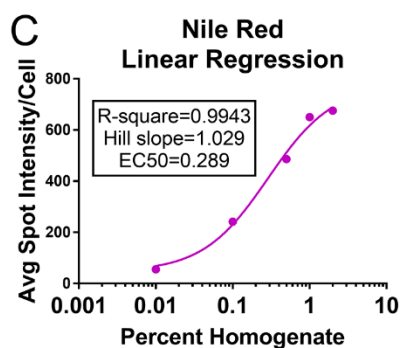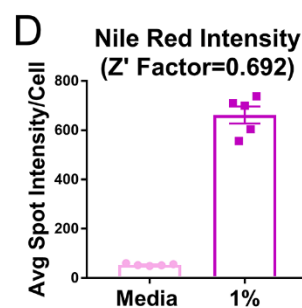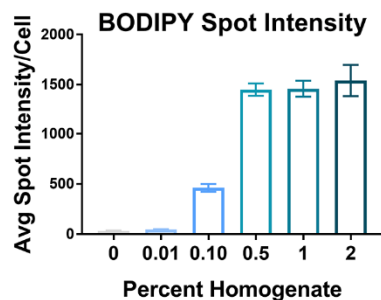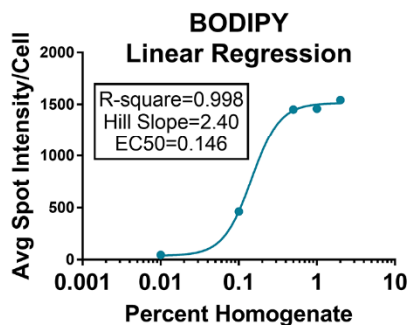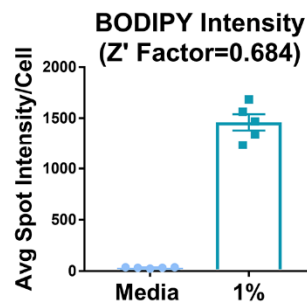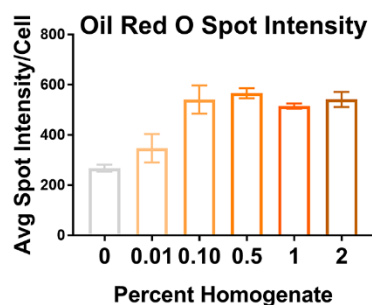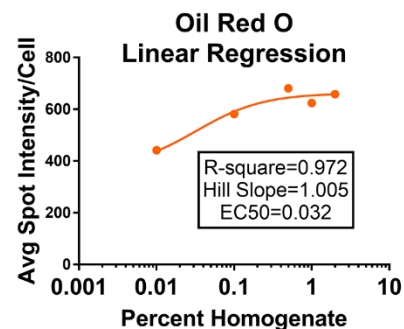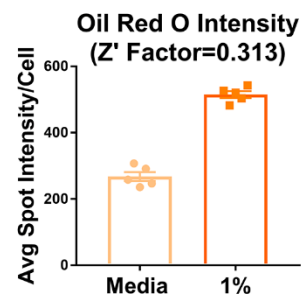

**Supplemental Figure 1. Comparison of lipid dyes demonstrates that Nile Red is the most suitable for spinal cord homogenate-based *in vitro* phenotypic assay.** (A) Representative images comparing lipid dyes Nile Red, BODIPY, and Oil Red O (all pseudo-colored in green) in cells treated with media, 0.1, 0.5, 1.0 and 2.0% spinal cord homogenate. Cell mask (red) and nuclei (blue). Scale bar=50  $\mu$ m. (A) Mean spot intensity per cell at each percent homogenate in cells stained with Nile Red, BODIPY, Oil Red O (n=10 technical replicates, error bars=SEM). (C) 4-parameter nonlinear regression fit for homogenate dose response in cells stained with Nile Red, BODIPY, Oil Red O (n=10 technical replicates, error bars=SEM. Goodness of fit assessed by R-square value and linearity of response calculated by Hill's Slope (1.0=perfectly linear), x-axis in logarithmic scale. (D) Z' factor calculations between positive (1% homogenate) and negative (media only) controls for lipid droplet intensity (n=5 technical replicates).

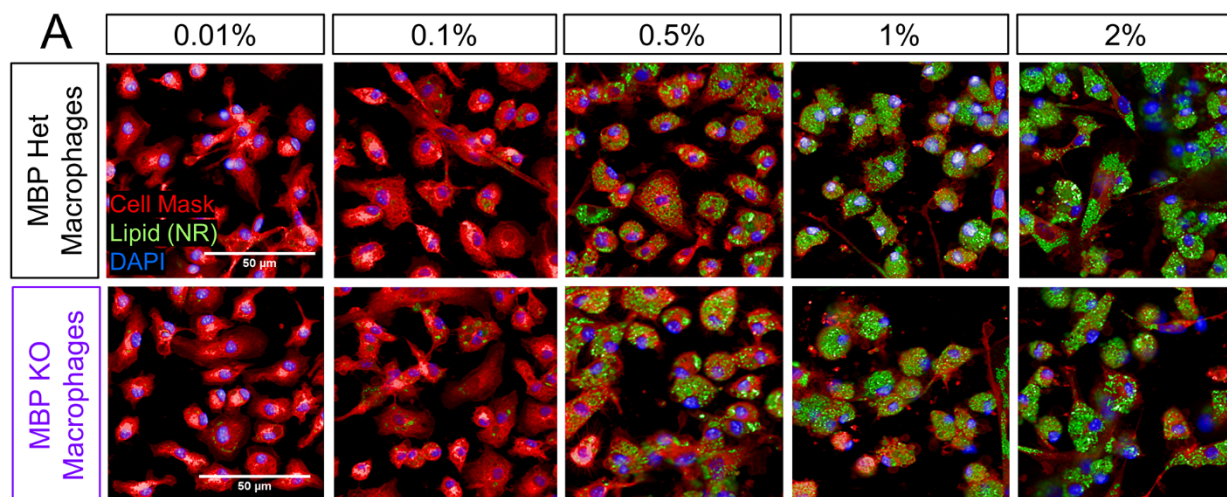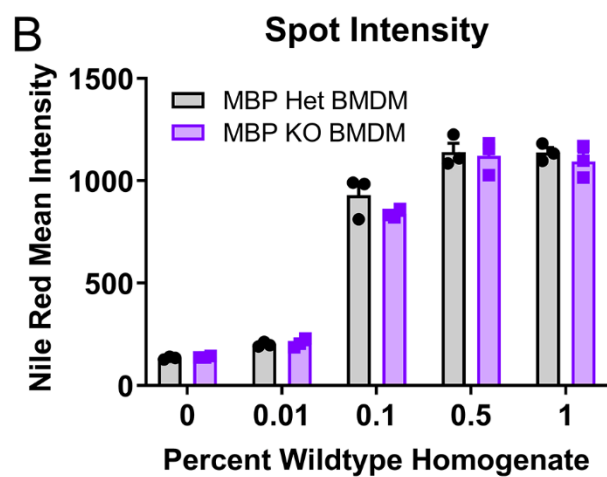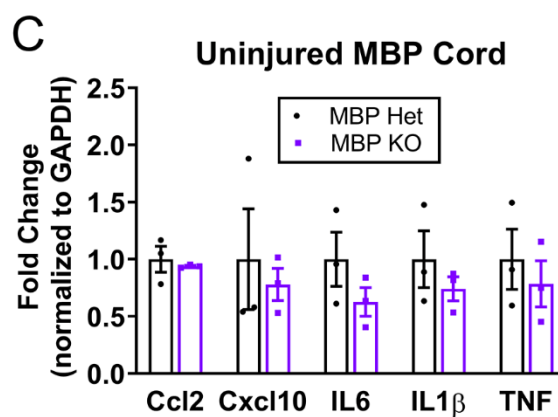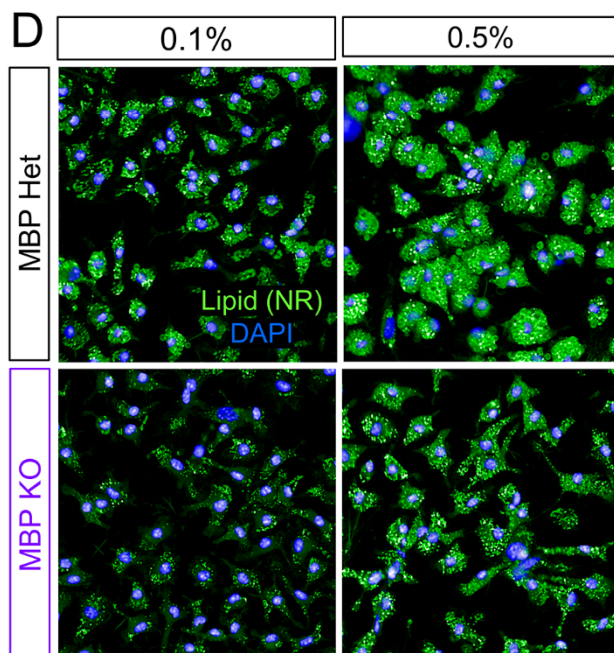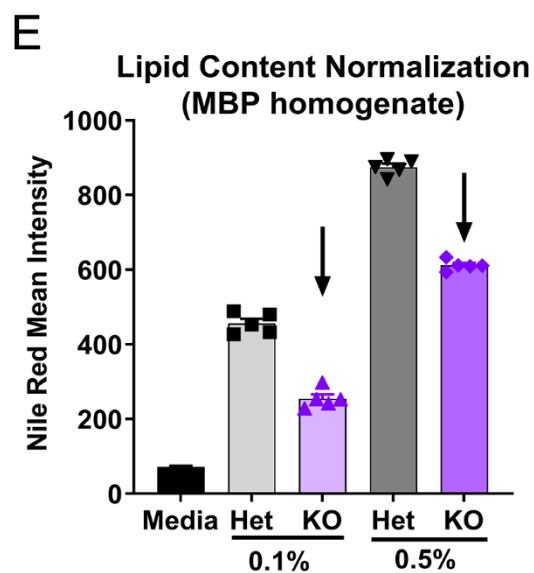

**Supplemental Figure 2. Comparisons between MBP Het and KO BMDMs and uninjured spinal cord. (A)**

Representative images from macrophages obtained from MBP Het and MBP KO treated with 0, 0.01, 0.1, 0.5, and 1% wildtype homogenate. Neutral lipid droplets stained with Nile Red (green), cell membrane with Cell Mask (red), and nuclei with DAPI (blue), scale bar=50  $\mu$ m. (B) Mean lipid droplet spot intensity in MBP Het and MBP KO macrophages treated with 0, 0.01, 0.1, 0.5, and 1% wildtype homogenate (n=3 technical replicates per group, two-way ANOVA with Bonferroni multiple comparisons, error bars SEM). (C) Inflammatory cytokine expression in uninjured MBP Het and MBP KO spinal cord homogenate. (n=3 biological replicates per group, \*p $\leq$ 0.05 compared to MBP Het, Two-tailed Student's t-test per cytokine, error bars=SEM) (D) Representative images from wildtype macrophages treated with MBP Het and KO homogenates at 0.1% and 0.5% concentrations. Neutral lipid droplets stained with Nile Red (Kroner et al.), cell membrane with Cell Mask (red), and nuclei with DAPI (blue). (E) Lipid droplet intensity in macrophages treated with 0.1% and 0.5% homogenate (n=5 technical replicates per condition, error bars=SEM). Wildtype cells treated with 0.1% MBP Het homogenate exhibited similar fluorescence to wildtype cells treated with 0.5% MBP KO homogenate.

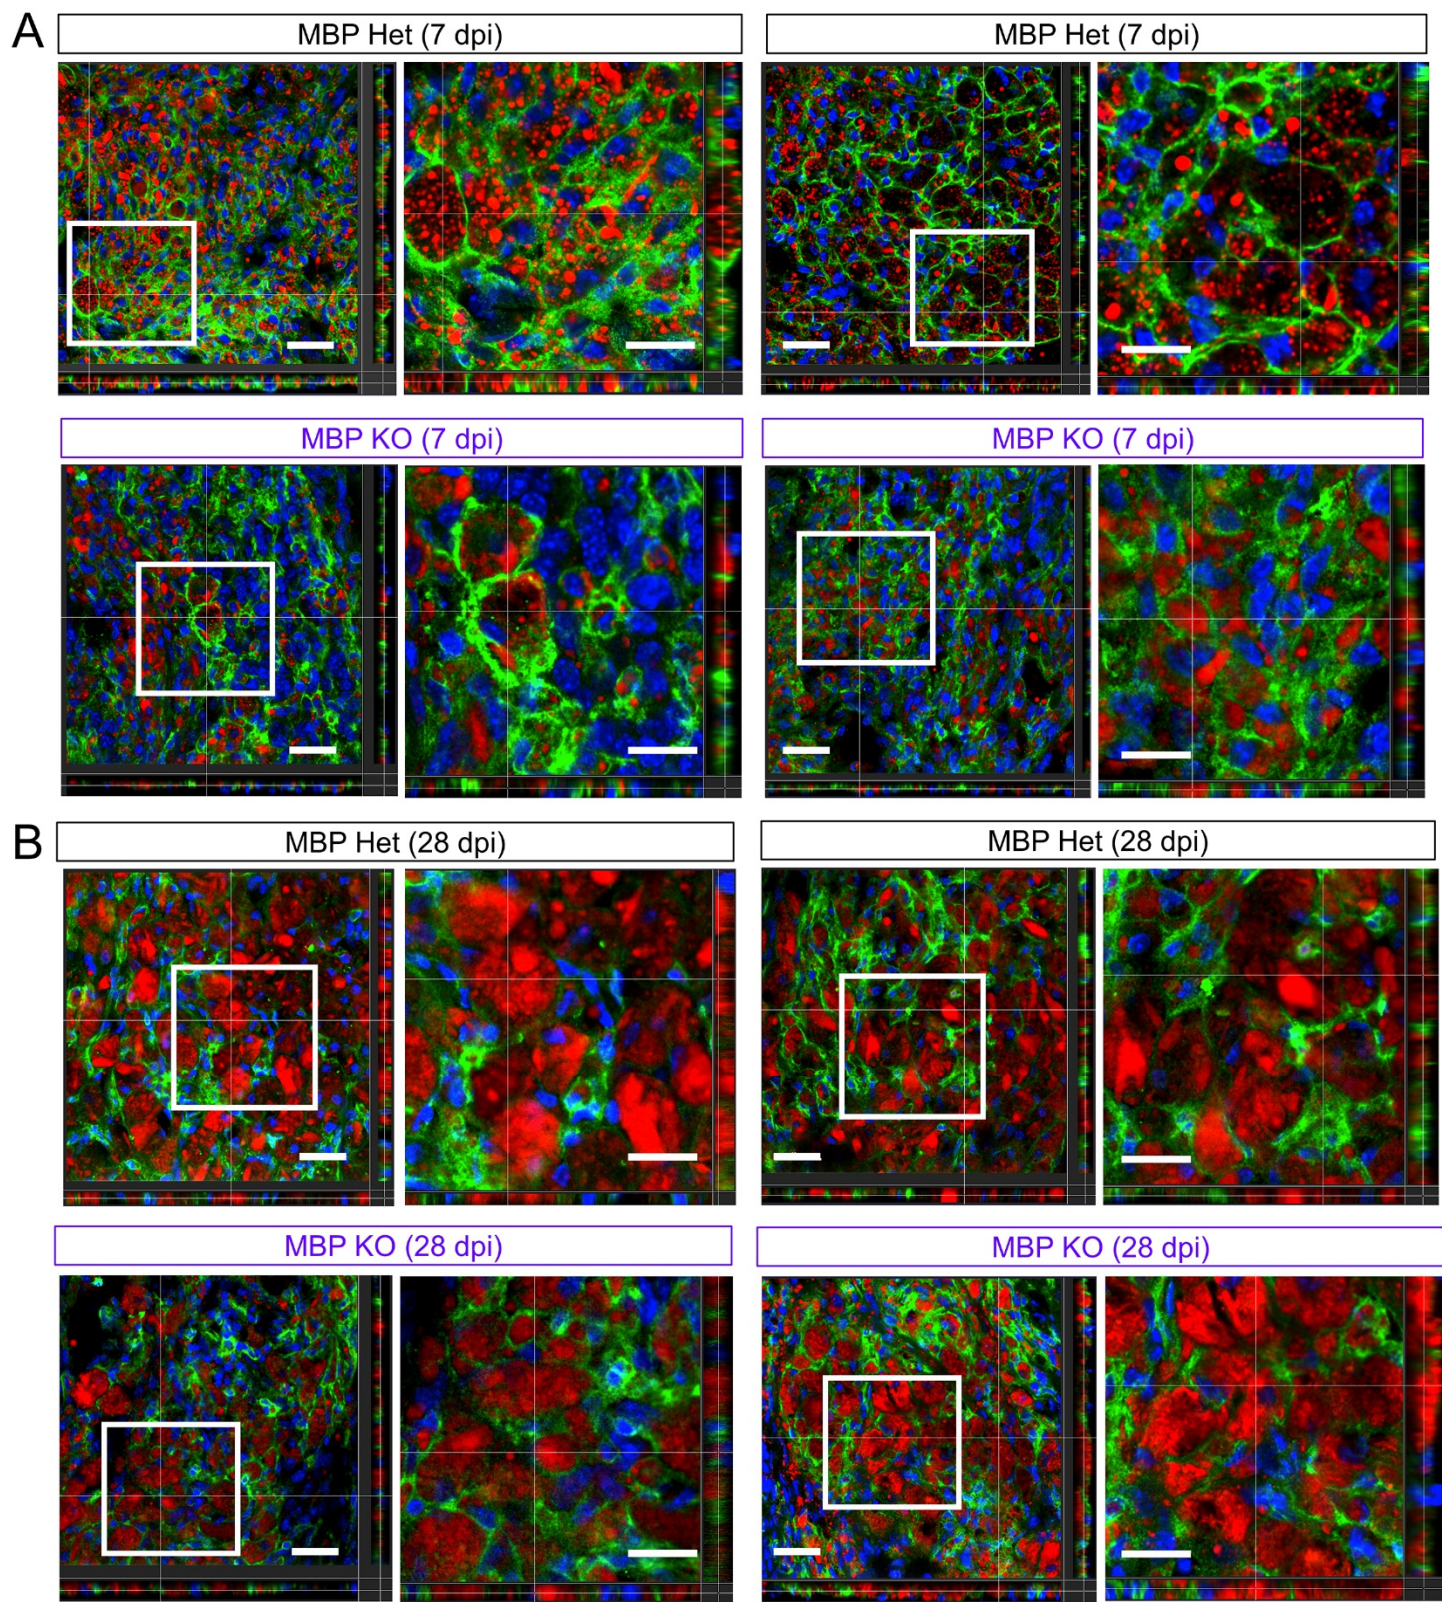

**Supplemental Figure 3. Oil Red O stained lipids localize to interior of CD11b+ cells.** (A) Representative confocal images including orthogonal projections from the SCI injury site in MBP Het and MBP KO mice at 7 days (A) and 28 days (B) post injury (dpi). Lipid droplets stained with Oil Red O (red), myeloid cells labeled with CD11b (green) and nuclei with DAPI (blue). Lower magnification scale bar=30  $\mu$ M in (A) and 200  $\mu$ m in (B), higher magnification scale bar 20  $\mu$ M. Representative images from two animals from Figure 4 are shown.
